# Supplementary material for: Ethnicity influences phenotype and clinical outcomes: Comparing a South American with a North American inflammatory bowel disease cohort
Source: PubMed Central journal article supplement (PMC10980497; doi:10.1097/md.0000000000030216), 2022-09-09
Supplement: medi-101-e30216b-s001.pdf [file medi-101-e30216b-s001.pdf]

**Supplemental Digital Content. Table S1.** Relationship between clinical parameters and extension (UC) disease in North American and Chilean IBD patients. a) Continuous variables (Mann-Whitney U test); b) Categorical variables (Fisher's exact test).

a)

| Mann-Whitney U tests | Disease Location |       |       |
|----------------------|------------------|-------|-------|
| Variable             | E1               | E2    | E3    |
| Age at Diagnosis     | -                | 0.315 | 0.508 |
| White Cells          | -                | 0.800 | 0.591 |
| Plateles             | -                | 0.768 | 0.079 |
| Albumin              | -                | 1.000 | 0.026 |
| Hemoglobin           | -                | 0.015 | 0.511 |
| CRP                  | -                | 0.269 | 0.488 |
| Duration of Disease  | -                | 1.000 | 0.082 |

b)

| Fisher's exact tests                           | Disease Location |       |       |
|------------------------------------------------|------------------|-------|-------|
| Variable                                       | E1               | E2    | E3    |
| Family history of IBD                          | -                | 1.000 | 1.000 |
| Sex                                            | -                | 0.007 | 0.134 |
| Hospitalization for IBD                        | -                | 0.108 | 0.809 |
| Smoking                                        | -                | 1.000 | 0.048 |
| Prior history of esterooids use                | -                | 0.183 | 0.644 |
| Prior history of immunomodulators use          | -                | 0.628 | 0.041 |
| Prior history of biological therapy use        | -                | 0.093 | 0.000 |
| History of discontinuation or anti-TNF failure | -                | 0.129 | 0.000 |
| Naive anti-TNF                                 | -                | 0.007 | 0.000 |
| Current esterooids therapy                     | -                | 1.000 | 0.107 |
| Current biological therapy                     | -                | 0.086 | 0.000 |
| Current anti-TNF therapy                       | -                | 0.268 | 0.008 |
| Current immunomodulator use                    | -                | 0.384 | 0.386 |

**Supplemental Digital Content. Table S2.** Relationship between clinical parameters and location (CD) disease in North American and Chilean IBD patients. a) Continuous variables (Mann-Whitney U test); b) Categorical variables (Fisher's exact test).

a)

| Mann-Whitney U tests | Disease Location |       |       |
|----------------------|------------------|-------|-------|
| Variable             | L1               | L2    | L3    |
| Age at Diagnosis     | 0.115            | 0.023 | 0.782 |
| White Cells          | 1.000            | 0.208 | 0.213 |
| Plateles             | 0.706            | 0.658 | 0.275 |
| Albumin              | 0.495            | 0.677 | 0.005 |
| Hemoglobin           | 0.261            | 0.246 | 0.207 |
| CRP                  | 0.152            | 0.482 | 0.480 |
| Duration Disease     | 1.000            | 0.124 | 0.890 |

b)

| Fisher's exact tests                           | Disease Location |       |       |
|------------------------------------------------|------------------|-------|-------|
| Variable                                       | L1               | L2    | L3    |
| Family history of IBD                          | 1.000            | 0.072 | 0.335 |
| Sex                                            | 1.000            | 0.099 | 0.721 |
| Hospitalization for IBD                        | 1.000            | 1.000 | 0.086 |
| Smoking                                        | 1.000            | 1.000 | 0.651 |
| Prior history of esterooids use                | 1.000            | 0.556 | 0.601 |
| Prior history of immunomodulators use          | 0.447            | 0.281 | 0.688 |
| Prior history of biological therapy use        | 0.079            | 0.006 | 0.004 |
| History of discontinuation or anti-TNF failure | 0.284            | 0.002 | 0.037 |
| Naive anti-TNF                                 | 0.111            | 0.012 | 0.001 |
| Current esterooids therapy                     | 1.000            | 0.563 | 0.398 |
| Current biological therapy                     | 0.053            | 0.006 | 0.005 |
| Current anti-TNF therapy                       | 0.032            | 0.223 | 0.157 |
| Current immunomodulator use                    | 0.521            | 0.589 | 0.732 |

**Supplemental Digital Content. Table S3.** Proportion of patients with Crohn’s disease undergoing biological therapies according to localization and center.

| <b>L1 (Ileal)</b>       | <b>Current biological therapy</b> |     | <b>p-Value</b> |
|-------------------------|-----------------------------------|-----|----------------|
| Center                  | No                                | Yes |                |
| USA                     | 0                                 | 2   | 0.053          |
| Chile                   | 15                                | 3   |                |
| <b>L2 (Colonic)</b>     | <b>Current biological therapy</b> |     | <b>p-Value</b> |
| Center                  | No                                | Yes |                |
| USA                     | 0                                 | 4   | 0.006          |
| Chile                   | 27                                | 8   |                |
| <b>L3 (ileocolonic)</b> | <b>Current biological therapy</b> |     | <b>p-Value</b> |
| Center                  | No                                | Yes |                |
| USA                     | 3                                 | 14  | 0.005          |
| Chile                   | 11                                | 5   |                |
