# Supplementary material for: Ethnicity influences phenotype and clinical outcomes: Comparing a South American with a North American inflammatory bowel disease cohort
Source: PubMed Central journal article supplement (PMC10980497; doi:10.1097/md.0000000000030216), 2022-09-09
Supplement: medi-101-e30216b-s002.pdf [file medi-101-e30216b-s002.pdf]

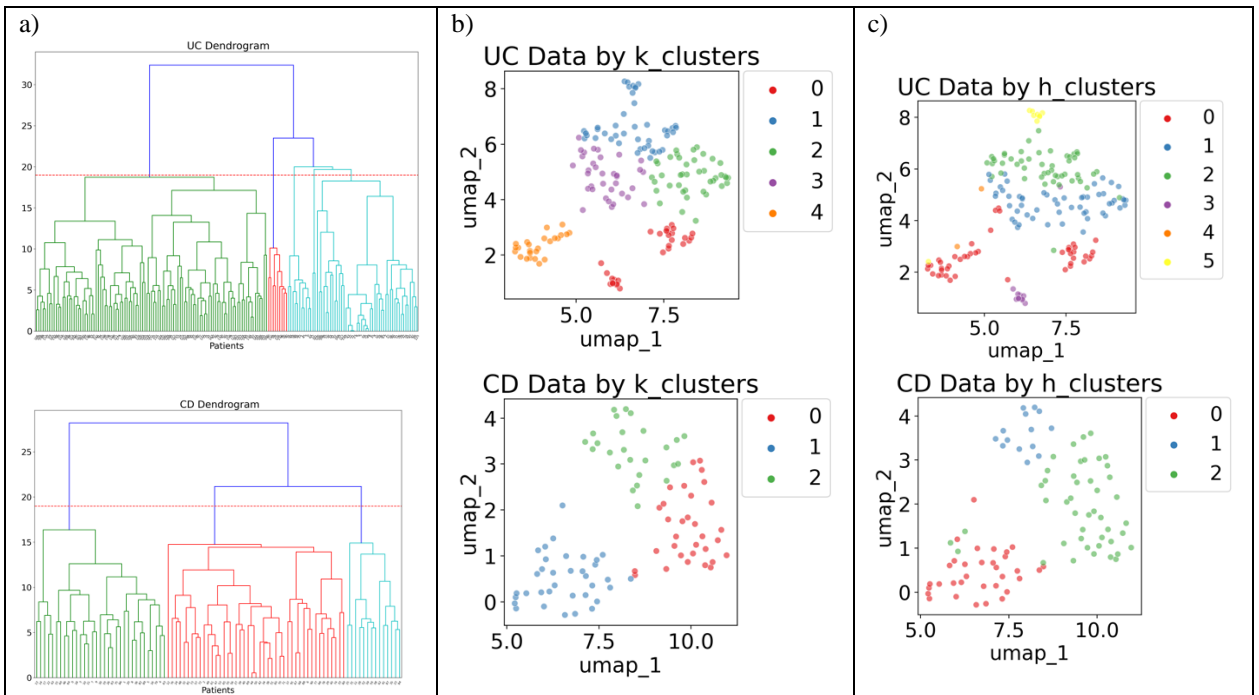

**Supplemental Digital Content S4 Figure. Clustering of IBD patients.** **A)** Hierarchical clustering for UC and CD patients using the Ward method. Tree was cut where 6 clusters were generated for UC and 3 for CD. **B)** K-means clustering of UC and CD patients. **C)** Hierarchical clustering for UC and CD patient data in UMAP projections of CD patients using Ward method. Tree was cut where 3 clusters were generated. KUC = 5, KCD = 3. nUC = 173, nCD = 92.
