# Supplementary material for: Ethnicity influences phenotype and clinical outcomes: Comparing a South American with a North American inflammatory bowel disease cohort
Source: PubMed Central journal article supplement (PMC10980497; doi:10.1097/md.0000000000030216), 2022-09-09

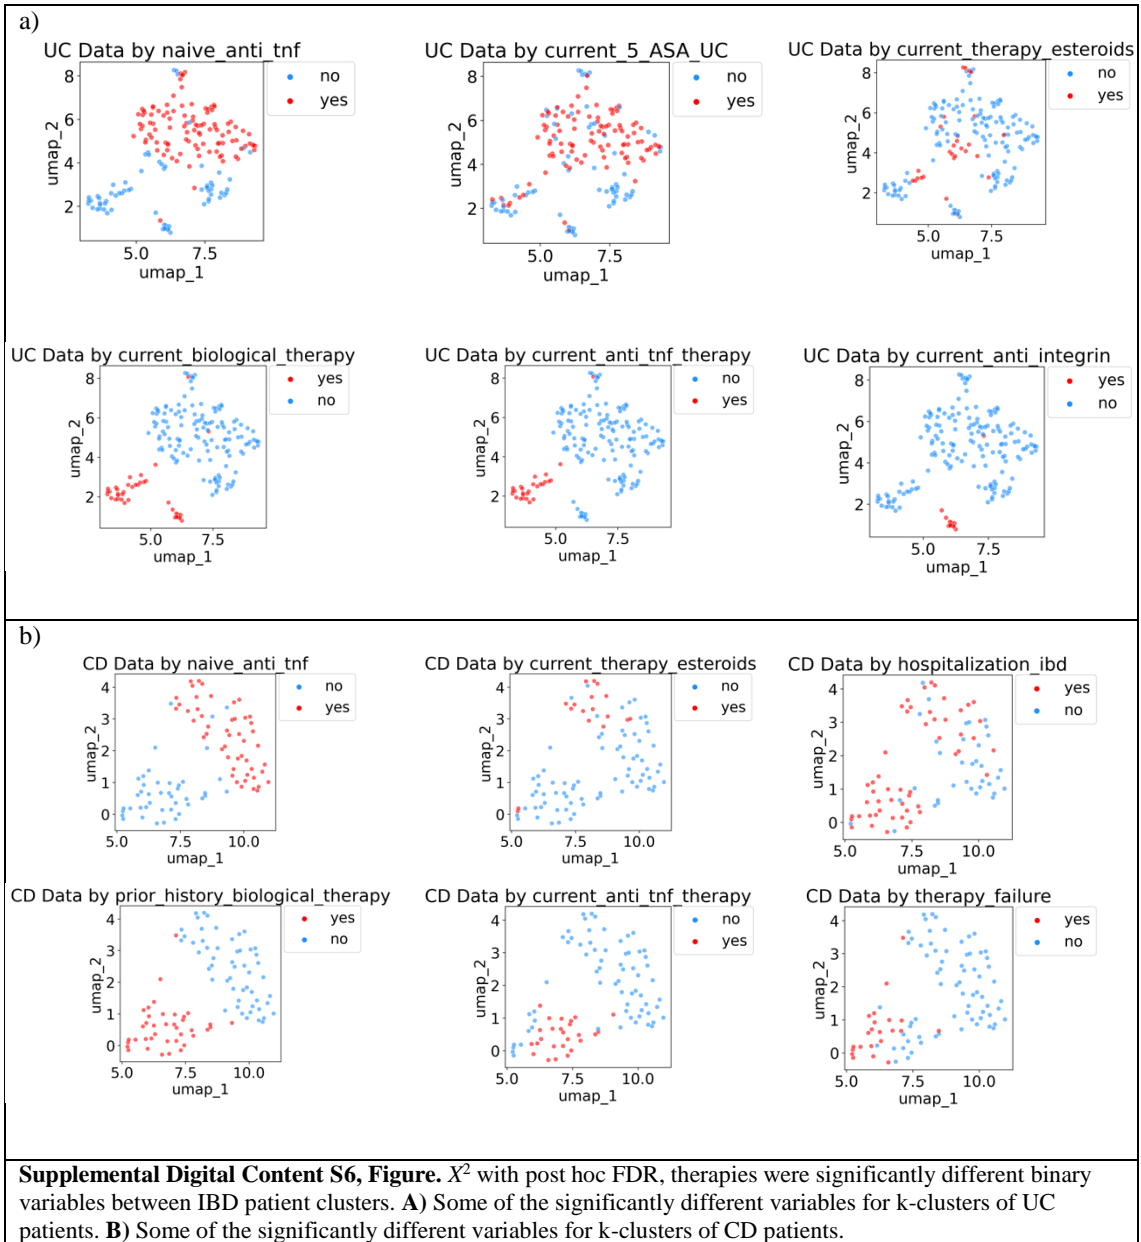

Supplement: medi-101-e30216b-s004.pdf [file medi-101-e30216b-s004.pdf]
