# Supplementary material for: Ethnicity influences phenotype and clinical outcomes: Comparing a South American with a North American inflammatory bowel disease cohort
Source: PubMed Central journal article supplement (PMC10980497; doi:10.1097/md.0000000000030216), 2022-09-09
Supplement: medi-101-e30216b-s005.pdf [file medi-101-e30216b-s005.pdf]

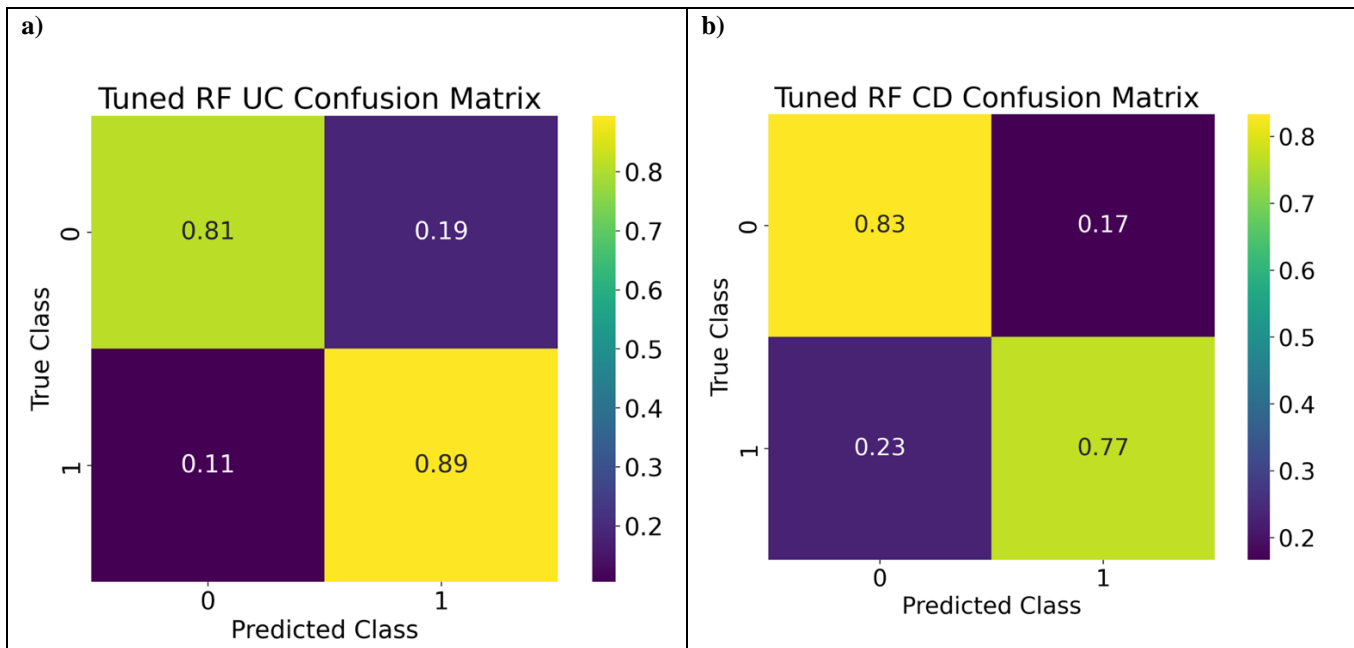

**Supplemental Digital Content S7, Figure. Confusion Matrix for cohort prediction.** In the X-axis, the confusion matrix shows the true class, i.e., the center to which the patient belongs, while in the Y-axis, it shows the predicted class of the RF model using the clinical data of the patients. A perfect classification will lead to a diagonal full of ones. a) UC model correctly classifies 81% of US patients and 89% of Chilean patients. b) CD model correctly classifies 83% of US patients and 77% of Chilean patients. 0: US patients, 1: Chilean.
