# Supplementary material for: Ethnicity influences phenotype and clinical outcomes: Comparing a South American with a North American inflammatory bowel disease cohort
Source: PubMed Central journal article supplement (PMC10980497; doi:10.1097/md.0000000000030216), 2022-09-09
Supplement: medi-101-e30216b-s006.pdf [file medi-101-e30216b-s006.pdf]

**Supplemental Digital Content S8, Table. Comparison of different supervised machine learning algorithms for center prediction in) Ulcerative Colitis patients. b) Crohn’s disease patients.**

**a)**

| UC Center Prediction                                         |           |        |          |
|--------------------------------------------------------------|-----------|--------|----------|
| Model                                                        | Precision | Recall | f1-score |
| Support -Vector Machine                                      | 0.71      | 0.71   | 0.71     |
| Logistic Regression                                          | 0.74      | 0.74   | 0.74     |
| AdaBoost                                                     | 0.86      | 0.86   | 0.86     |
| Multi Layer Perceptron                                       | 0.87      | 0.86   | 0.85     |
| Linear Discriminant Analysis                                 | 0.81      | 0.80   | 0.80     |
| Random Forest                                                | 0.86      | 0.86   | 0.86     |
| For Precision. Recall and f1-Score weighted average was used |           |        |          |

**b)**

| Crohn’s Disease Center Prediction                            |           |        |          |
|--------------------------------------------------------------|-----------|--------|----------|
| Model                                                        | Precision | Recall | f1-score |
| Support-Vector Machine                                       | 0.69      | 0.63   | 0.64     |
| Logistic Regression                                          | 0.69      | 0.63   | 0.64     |
| AdaBoost                                                     | 0.82      | 0.79   | 0.80     |
| Multi Layer Perceptron                                       | 0.69      | 0.63   | 0.64     |
| Linear Discriminant Analysis                                 | 0.50      | 0.53   | 0.51     |
| Random Forest                                                | 0.82      | 0.79   | 0.80     |
| For Precision. Recall and f1-Score weighted average was used |           |        |          |
